# Supplementary material for: Comparing the role of annealing on the transport properties of polymorphous AgBiSe2 and monophase AgSbSe2
Source: Royal Society of Chemistry journal article supplement (doi:10.1039/c7ra12819c), 2018-01-01
Supplement: c7ra12819c1.pdf [file c7ra12819c1.pdf]

## Electronic Supplementary Material:

### Comparing the role of annealing on the transport properties of polymorphous AgBiSe<sub>2</sub> and monophase AgSbSe<sub>2</sub>

Minmin Zou<sup>\*,a</sup>, Qing Liu<sup>a,b</sup>, Chao-Feng Wu<sup>c</sup>, Tian-Ran Wei<sup>c</sup>, Qing Tan<sup>d</sup>, Jing-Feng Li<sup>c</sup> and Fei Chen<sup>a</sup>

**Table S1** Lattice parameters of AgBiSe<sub>2</sub> at different preparation stage obtained from Rietveld refinements of powder XRD data

| Samples                        | p $\bar{3}m1$ |       | R $\bar{3}m$ |              |
|--------------------------------|---------------|-------|--------------|--------------|
|                                | a (Å)         | c(Å)  | a (Å)        | $\alpha$ (°) |
| AgBiSe <sub>2</sub> -melting   | 4.191         | 19.64 | 7.080        | 33.95        |
| AgBiSe <sub>2</sub> -SPS       | 4.164         | 19.60 | 6.975        | 34.89        |
| AgBiSe <sub>2</sub> -annealing | 4.194         | 19.63 | 7.044        | 34.35        |

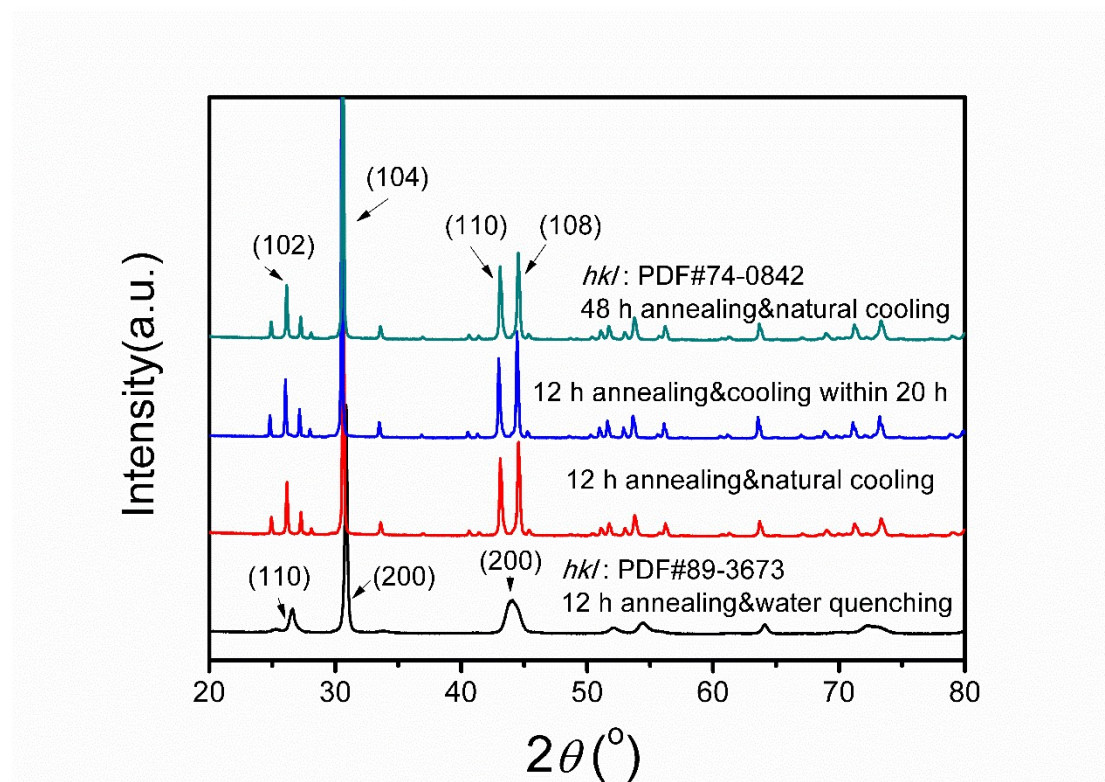

Fig. S1 XRD patterns of bulk AgBiSe<sub>2</sub> samples with different annealing process.
